# Supplementary material for: Lifestyle, WCRF/AICR Recommendations and Esophageal Adenocarcinoma Risk. A Systematic Review of the Literature
Source: Preprints.org preprint supplement (doi:10.20944/preprints202108.0208.v1), 2021-08-09
Supplement: Supplementary file 1 [file Supplementary Tables.docx]

**Supplementary Table S1** **Quality assessment of case-control studies, using the Newcastle-Ottawa Scale (NOS), in alphabetical order**

| **Author year [Ref]** | **Selection** | | | | **Comparability** | | **Outcome/Exposure^** | | | **Total score/9** |
| --- | --- | --- | --- | --- | --- | --- | --- | --- | --- | --- |
| Item 1 | Item 2 | Item 3 | Item 4 | Item 5a | Item 5b | Item 6 | Item 7 | Item 8 |
| Anderson, et al. 2009 [31] | * | * | * | - | * | * | * | * | - | 7 |
| Anderson, et al. 2007 [32] | * | * | * | * | * | * | - | * | - | 7 |
| Bahmanyar, et al. 2006 [33] | * | * | * | - | * | * | * | * | * | 8 |
| Bollschweiler, et al. 2002 [34] | * | * | * | - | - | - | - | * | - | 4 |
| Chen, et al. 2002 [35] | - | - | - | - | * | * | - | * | - | 3 |
| Chen, et al. 2002 [36] | * | * | - | - | * | * | * | * | * | 7 |
| Chen, et al. 2011 [37] | * | * | * | * | * | - | - | - | - | 5 |
| Cheng, et al. 2000 [38] | * | * | * | - | * | * | - | * | * | 7 |
| Chow, et al. 1998 [39] | * | * | * | * | * | * | * | * | * | 9 |
| Corley, et al. 2008 [40] | * | - | * | * | * | * | * | * | * | 8 |
| Dai, et al. 2016 [41] | * | * | * | * | * | * | - | * | - | 7 |
| de Jonge, et al. 2006 [42] | * | * | - | * | * | * | - | * | * | 7 |
| Drahos, et al. 2016 [43] | * | * | * | * | * | * | * | * | - | 8 |
| Duan, et al. 2009 [44] | * | * | - | - | * | * | - | * | - | 5 |
| Engel, et al. 2003 [45] | * | * | * | - | * | * | - | * | * | 7 |
| Gammon, et al. 1997 [46] | * | * | * | - | * | * | - | * | * | 7 |
| Gao, et al. 1994 [47] | * | * | * | - | * | * | - | * | - | 6 |
| Garidou, et al. 1996 [48] | * | * | - | - | * | * | - | * | * | 6 |
| Hashibe, et al. 2007 [49] | * | * | - | - | * | * | - | * | * | 6 |
| Ibiebele, et al. 2012 [50] | * | * | * | - | * | * | * | * | * | 8 |
| Ibiebele, et al. 2013 [51] | * | * | * | - | * | * | * | * | * | 8 |
| Jansson, et al. 2005 [52] | * | * | * | - | * | * | * | * | - | 7 |
| Lagergren, et al. 1999 [53] | * | * | * | * | * | * | - | * | - | 7 |
| Lagergren, et al. 2000 [54] | * | * | * | - | * | * | - | * | - | 6 |
| Lagergren, et al. 2006 [55] | * | * | * | - | * | - | * | * | * | 7 |
| Lagergren, et al. 2013 [56] | * | * | * | - | * | * | - | * | - | 6 |
| Lagergren, et al. 2014 [57] | * | * | * | - | * | * | - | * | - | 6 |
| Lahmann, et al. 2014 [58] | * | * | * | - | * | * | * | - | - | 6 |
| Li, et al. 2017 [59] | * | * | * | - | * | * | * | * | - | 7 |
| Lin, et al. 2011 [60] | * | * | * | - | * | * | * | * | - | 7 |
| Lin, et al. 2014 [61] | * | * | * | - | * | * | * | * | - | 7 |
| Lin, et al. 2012 [62] | * | * | * | - | * | * | - | * | - | 6 |
| Lindblad, et al. 2005 [63] | - | * | * | * | * | * | * | * | - | 7 |
| Lu, et al. 2015 [64] | * | * | * | - | * | * | * | * | - | 7 |
| MassI, et al. 2014 [65] | * | * | - | - | * | - | * | * | - | 5 |
| Mayne, et al. 2001 [66] | * | * | * | - | * | * | * | * | * | 8 |
| Mayne, et al. 2006 [67] | * | * | * | - | * | * | - | * | - | 6 |
| Mulholland, et al. 2011 [68] | * | * | * | * | * | * | - | * | * | 8 |
| Murphy, et al. 2010 [69] | * | * | * | * | * | * | - | * | - | 7 |
| Navarro Silvera, et al. 2014 [72] | * | * | * | - | * | * | * | * | - | 7 |
| Navarro Silvera, et al. 2008 [70] | * | * | * | - | * | * | * | * | - | 7 |
| Navarro Silvera, et al. 2011 [71] | * | * | * | - | * | * | * | * | - | 7 |
| O'Doherty, et al. 2010 [73] | * | * | * | * | * | * | - | * | - | 7 |
| O'Doherty, et al. 2011 [74] | * | * | * | * | * | * | - | * | - | 7 |
| Olsen, et al. 2011 [75] | * | * | * | - | * | * | - | * | - | 6 |
| Pandeya, et al. 2008 [76] | * | * | * | - | * | * | - | * | - | 6 |
| Pandeya, et al. 2009 [77] | * | * | * | - | * | * | - | * | - | 6 |
| Pandeya, et al. 2010 [78] | * | * | * | - | * | * | - | * | - | 6 |
| Petrick, et al. 2015 [79] | * | * | * | - | * | * | * | * | * | 8 |
| Pohl, et al. 2013 [80] | * | * | - | * | * | * | - | * | - | 6 |
| Ryan, et al. 2006 [81] | * | * | * | - | * | * | - | * | - | 6 |
| Sharp, et al. 2013 [82] | * | - | * | * | * | * | * | * | - | 7 |
| Terry, et al. 2000 [83] | * | * | * | - | * | * | - | * | * | 7 |
| Terry, et al. 2001 [84] | * | * | * | - | * | * | - | * | - | 6 |
| Terry, et al. 2003 [85] | * | * | * | - | * | * | - | * | - | 6 |
| Thrift, et al. 2014 [86] | * | - | * | * | * | * | * | * | - | 7 |
| Tzonou, et al. 1996 [87] | * | * | - | - | * | * | * | * | * | 7 |
| Veugelers, et al. 2006 [88] | * | * | - | - | * | * | - | * | - | 5 |
| Vigen, et al. 2006 [89] | * | * | * | - | * | * | * | * | - | 7 |
| Ward, et al. 1997 [90] | * | * | * | - | * | * | - | * | - | 6 |
| Ward, et al. 2012 [92] | * | * | * | - | * | * | - | * | - | 6 |
| Ward, et al. 2008 [91] | * | * | * | - | * | * | - | * | * | 7 |
| Whiteman, et al. 2008 [93] | * | * | * | - | * | * | - | * | - | 6 |
| Wolfgarten, et al. 2001 [94] | * | * | * | - | - | - | * | * | - | 4 |
| Wu, et al. 2007 [96] | * | * | * | * | * | * | - | * | - | 7 |
| Wu, et al. 2001 [95] | * | * | * | * | * | * | - | * | - | 7 |
| ^based on study design. For case-control the NOS assessed the exposure, for cross-sectional and cohort studies the outcome. | | | | | | | | | | |

**Supplementary Table S2** **Quality assessment of cohort studies, using the Newcastle-Ottawa Scale (NOS), , in alphabetical order**

| **Author year [Ref]** | **Selection** | | | | **Comparability** | | **Outcome/Exposure^** | | | **Total score/9** |
| --- | --- | --- | --- | --- | --- | --- | --- | --- | --- | --- |
| Item 1 | Item 2 | Item 3 | Item 4 | Item 5a | Item 5b | Item 6 | Item 7 | Item 8 |
| Abnet, et al. 008 [97] | * | * | * | * | * | * | * | - | * | 8 |
| Allen, et al. 2009 [98] | * | * | - | * | * | * | * | - | * | 7 |
| Carman, et al. 2009 [99] | * | * | * | * | * | * | * | - | * | 8 |
| Cook, et al. 2013 [100] | * | * | - | * | * | * | * | * | - | 7 |
| Cross, et al. 2011 [101] | * | * | * | * | * | * | * | * | - | 8 |
| Dawsey, et al. 2014 [102] | * | * | * | * | * | * | * | * | - | 8 |
| De Jonge, et al. 2007 [103] | * | - | * | - | * | * | ** | * | n.a. | 7 |
| Engeland, et al. 2004 [104] | * | * | * | * | * | * | * | * | * | 9 |
| Freedman, et al. 2007 [105] | * | * | - | * | * | * | * | - | * | 7 |
| Freedman, et al. 2007 [106] | * | * | * | - | * | * | * | - | * | 7 |
| Gatenby, et al. 2008 [107] | * | * | * | * | * | - | * | * | - | 7 |
| Gonzalez, et al. 2006 [108] | * | * | * | - | * | * | * | - | * | 7 |
| Gonzalez, et al. 2006 [109] | * | * | * | - | * | * | * | - | * | 7 |
| Hardikar, et al. 2013 [110] | * | * | * | * | * | * | * | * | * | 9 |
| Huerta, et al. 2010 [111] | * | * | * | - | * | * | * | * | * | 8 |
| Jakszyn, et al. 2013 [112] | * | * | * | * | * | * | * | * | * | 9 |
| Ji, et al. 2016 [113] | * | - | * | - | * | * | * | * | * | 7 |
| Keszei, et al. 2012 [114] | * | * | * | - | * | * | * | * | * | 8 |
| Keszei, et al. 2013 [115] | * | * | * | * | * | * | * | * | * | 9 |
| Levi, et al. 2013 [116] | * | * | - | - | * | * | * | * | * | 7 |
| Li, et al. 2013 [117] | * | * | - | * | * | * | * | * | - | 7 |
| Lin, et al. 2015 [118] | * | * | * | * | * | * | * | * | - | 8 |
| Merry, et al. 2007 [119] | * | * | * | * | * | * | * | * | * | 9 |
| O'Doherty, et al. 2012 [120] | * | * | * | * | * | * | * | * | - | 8 |
| O'Doherty, et al. 2012 [121] | * | * | - | - | * | * | * | * | * | 7 |
| Petrick, et al. 2017 [122] | * | * | - | * | * | * | * | * | * | 8 |
| Reeves, et al. 2007 [123] | * | * | - | * | * | * | * | - | - | 6 |
| Ren, et al. 2010 [124] | * | * | * | * | * | * | * | - | * | 8 |
| Samanic, et al. 2006 [125] | * | * | * | - | * | * | * | * | * | 8 |
| Sanikini, et al. 2020 [126] | * | * | * | * | * | * | * | * | * | 9 |
| Steevens, et al. 2010 [127] | * | * | * | * | * | * | * | * | * | 9 |
| Steevens, et al. 2010 [128] | * | * | * | * | * | * | * | * | * | 9 |
| Steevens, et al. 2011 [129] | * | * | * | * | * | * | * | * | * | 9 |
| Steffen, et al. 2009 [130] | * | * | * | * | * | * | * | - | * | 8 |
| Steffen, et al. 2015 [131] | * | * | * | * | * | * | * | * | * | 9 |
| Vermeulen, et al. 2013 [132] | * | * | * | * | * | * | * | * | * | 9 |
| Xiao, et al. 2014 [134] | * | * | - | * | * | * | * | * | * | 8 |
| Yates, et al. 2014 [133] | * | * | * | * | * | - | * | * | * | 8 |
| Zamora-Ros, et al. 2014 [135] | * | * | * | * | * | * | * | * | * | 9 |
| Zendehdel, et al. 2008 [136] | * | * | * | - | * | * | * | * | * | 8 |
| ^based on study design. For case-control the NOS assessed the exposure, for cross-sectional and cohort studies the outcome. | | | | | | | | | | |
